# Supplementary material for: Cytomegalovirus promotes murine glioblastoma growth via pericyte recruitment and angiogenesis
Source: JCI journal article supplement (doi:10.1172/jci123375), 2019-03-10
Supplement: sd1 [file 1]

## Supplementary Figures

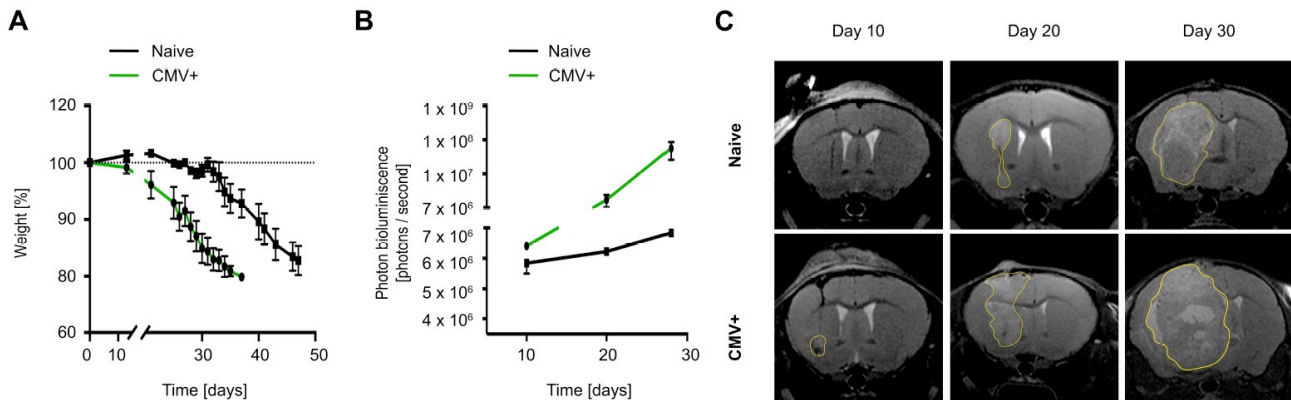

**Supplementary Figure 1. Accelerated GBM growth in MCMV-infected mice a,** Weight curve of mice intracranially implanted with GL261Luc2 cells. Data is shown as mean  $\pm$  SD values. **b,** BLI of tumors implanted in uninfected and MCMV+ mice 10, 20 and 30 days after tumor cell injection. Data is shown as mean  $\pm$  SD values **c,** Time-matched T2-weighted MRI depicting tumor growth over time. Uninfected controls are shown in the upper panels, and MCMV+ animals in the lower panels at Days 10, 20 and 30 post tumor cell injection. The tumor boundary is indicated by the yellow line.

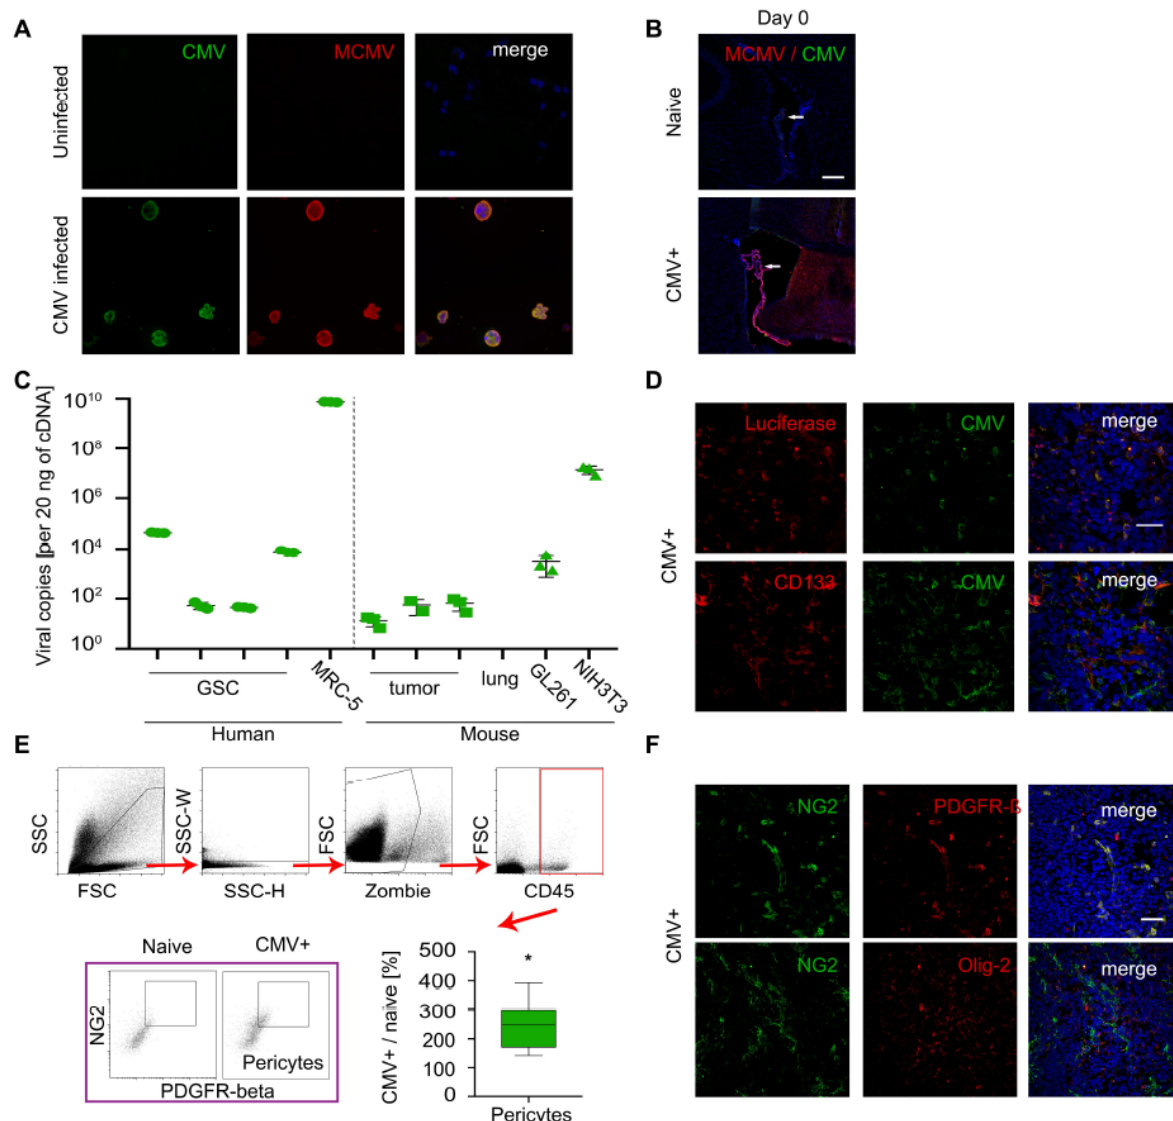

**Supplementary Figure 2. MCMV detection and increased pericyte numbers in GL261Luc2 tumors *in vivo*.** **a**, CMV (green) and MCMV (red) staining in MCMV infected GL261 cells *in vitro* 48 hours post-infection. **b**, CMV (green) and MCMV (red) Immunofluorescence in MCMV+ mice aged 14 weeks, without tumor implantation. MCMV is detected in the ventricular wall, choroid plexus and subventricular zone (arrow) in brains of MCMV+ mice prior to tumor injection (scale bar = 200  $\mu$ m). **c**, Luciferase (red), CD133 (red) and MCMV (green), nuclei (blue) Immunofluorescence staining with in brain sections taken from animals at the endpoint of survival studies (scale bar = 50 $\mu$ m). Pearson's rank co-localization (mean

$\pm$  SD) from  $n = 3$  tumor specimens. Error bars indicate SD. **d**, Quantitative RT-PCR analysis of HCMV IE1 in G44 GSCs, and in MRC5 fibroblasts, and MCMV in tumor from MCMV+ mice, MCMV+ tumor-bearing mouse lung ( $n+3$ ) and in MCMV infected GL261 cells **e**, Flow cytometric quantification of tumour infiltrating pericytes. Dot plots represent NG2/PDGFR- $\beta$  double-positive cells within the ipsilateral hemisphere in MCMV+ ( $n = 3$ ) and naïve mice ( $n = 3$ ). In the graphical representation the box extends from the 25<sup>th</sup> to 75<sup>th</sup> percentile, and the median is indicated by a horizontal line. The whiskers represent the maximum and minimum values.\* $P < 0.05$  (two-way ANOVA). **f**, Upper panel shows anti-PDGFR- $\beta$  (red) and NG2 (green) immunostaining confirming presence of pericytes in GBMs growing in MCMV+. The lower panel shows Olig2 (red) and NG2 (green) co-staining. DAPI stained nuclei are shown in blue (scale bar = 50 $\mu$ m).

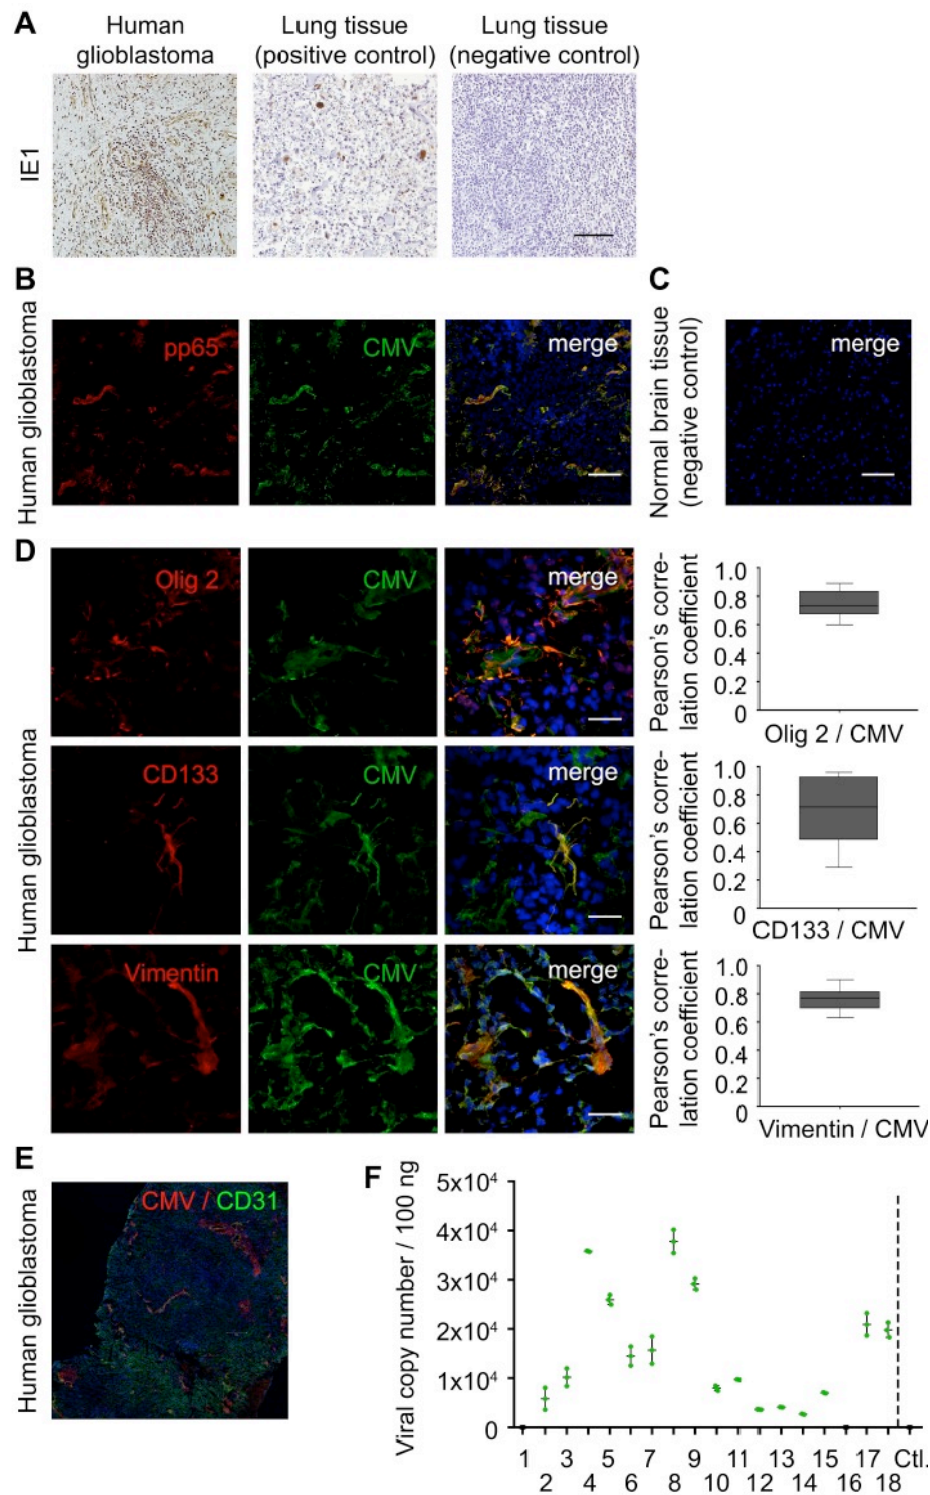

**Supplementary Figure 3. HCMV is detectable in human GBM tissue and associates with the perivascular niche.** **a**, IE-1 immunohistochemical staining in human GBM and HCMV positive lung control tissue. (scale bar = 50  $\mu$ m) **b**, CMV (green) and pp65 (red) immunofluorescence in human GBM specimens and **c**, cortical tissue (control) DAPI stained nuclei are shown in blue. **d**, CMV (green), Olig2

(red), anti-CD133 (red) and vimentin (red), and nuclei (blue) immunofluorescence staining (scale bar = 50μm). In graphical representations the box extends from the 25th to 75th percentile, and the median is indicated by a horizontal line. The whiskers represent the maximum and minimum values. **e**, HCMV (red) and CD31 (green) staining in a representative human GBM specimen. **f**, Quantitative RT-PCR analysis of HCMV IE1 mRNA levels in human GBM specimens.

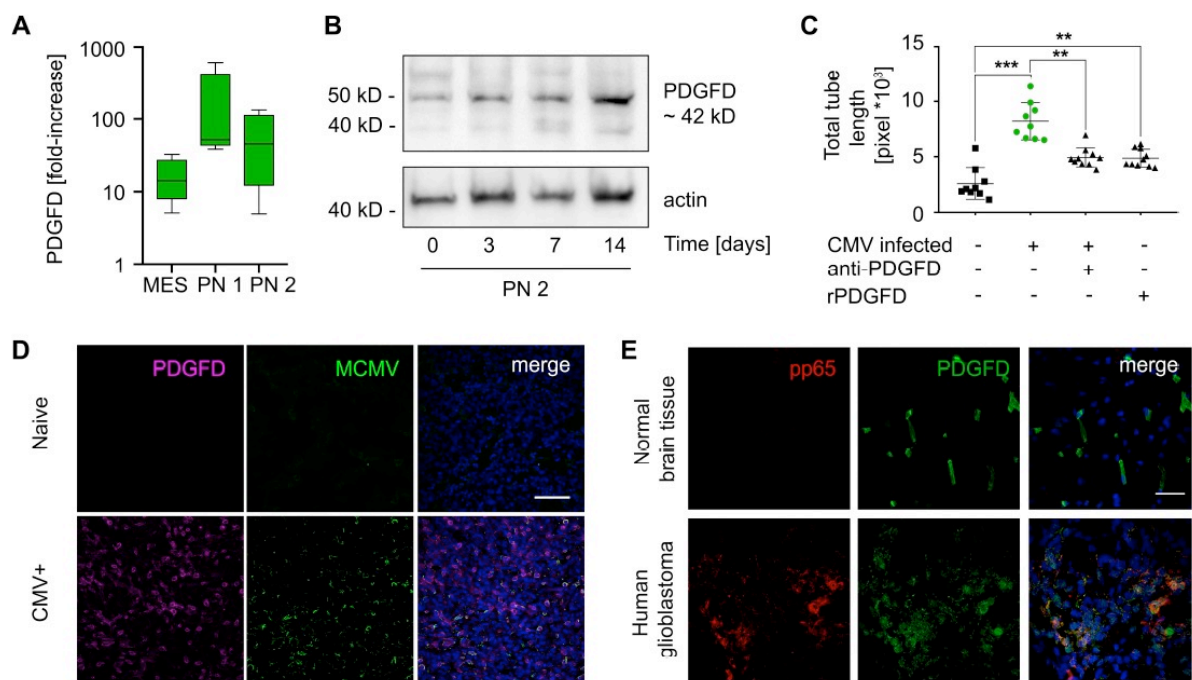

**Supplementary Figure 4. PDGF-D regulates the CMV-induced vascular phenotype and plays a critical role in GL261 tumor growth.** **a**, RT-PCR analysis of PDGF-D mRNA in multiple GSCs three days after HCMV infection. The box extends from the 25th to 75th percentile, and the median is indicated by a horizontal line. The whiskers represent the maximum and minimum values.. **b**, Western blot analysis of PDGF-D in proneural GSCs at days 0, 3, 7 and 14 post HCMV infection. **c**, HBMEC tube formation on matrigel performed using conditioned media from HCMV-infected human GSCs four days post-infection as well as uninfected control media, in the presence and absence of recombinant human PDGF-D and anti-PDGF-D neutralizing antibodies. Data analysis is presented as mean  $\pm$  SD \*\* $P$  < 0.01, \*\*\* $P$

$< 0.001$ , Holm-Šídák test. **d**, pp65 (green) and mouse PDGF-D (magenta) immunostaining in brain sections taken from animals at the endpoint of survival studies. DAPI stained nuclei are shown in blue (scale bar = 50  $\mu$ m). **e**, pp65 (green), PDGF-D (magenta) and nuclei (blue) immunofluorescence in GBM sections (scale bar = 50  $\mu$ m). Panels from this figure are also shown in Fig. 5G.

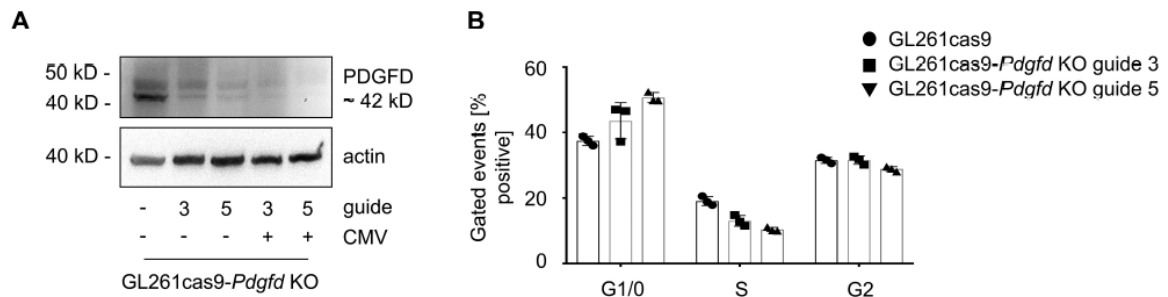

**Supplementary Figure 5. Effect of *Pdgfd* knockdown on cell cycle parameters in GL261cas9 cells.** **a**, Western blot analysis of PDGF-D in uninfected and MCMV-infected GL261*Pdgfd*KO cells (guides 3 and 5). **b**, Cell cycle distribution of GL261*Pdgfd*KO (guides 3 and 5) cells was measured (uninfected vs. MCMV-infected (MOI 1)). Data are represented as mean  $\pm$  SD. \* $P < 0.05$ , \*\* $P < 0.01$ , \*\*\* $P < 0.001$ , two-way ANOVA.

**Supplementary Table 1. Proangiogenic genes identified in CMV infected GSCs from RNA-Seq data.**

| Gene ID      | Gene name                                            | Log2 fold change<br>CMV/normal | Adjusted P Value | Major Functions          | Function in glioblastoma               |
|--------------|------------------------------------------------------|--------------------------------|------------------|--------------------------|----------------------------------------|
| <b>BMP4</b>  | Bone morphogenetic protein 4                         | 4.588902                       | 8.37E-20         | Development              | Pro-differentiation (33)               |
| <b>CCL2</b>  | C-C motif chemokine ligand 2 (MCP1)                  | 7.640191                       | 2.26E-94         | Monocyte chemoattraction | Treg and MDSC recruitment (34)         |
| <b>CXCL8</b> | C-X-C motif chemokine ligand 8 (Interleukin 8)       | 5.700278                       | 3.00E-46         | Pro-inflammatory         | Pro-angiogenic (35)                    |
| <b>LIF</b>   | Leukemia Inhibitory Factor                           | 3.243461                       | 1.64E-169        | Pleiotropic cytokine     | Promotes Glioma stem cell renewal (36) |
| <b>PDGFD</b> | Platelet-derived growth factor $\delta$              | 2.753318                       | 0.001808         | Percyte recruitment      | <b>NOT STUDIED</b>                     |
| <b>WNT4</b>  | wingless-type MMTV integration site family, member 4 | 3.087092                       | 0.000339         | Development              | CNS specific angiogenesis (37)         |

We profiled gene expression in G44 GSCs after CMV infection. To identify genes potentially involved with the proangiogenic phenotype, we curated a list for proangiogenic soluble factors from genes intersecting between GO: 1901342 (regulation of vascular development) and M5883 (BIOCARTA MsigDB, genes encoding secreted soluble factors). This list was then intersected with significantly upregulated genes from RNA-Seq leading to a final number of 6 genes with known proangiogenic functions as shown.

## Supplementary Table 2

### Primer sequences used in the study

| Species/Gene | Fwd/Rev | Sequence                     |
|--------------|---------|------------------------------|
| <b>Mouse</b> |         |                              |
|              |         | <b>Orientation ( 5'/3' )</b> |
| Ppia         | Fwd     | CAAACACAAACGGTTCCCAG         |
| Ppia         | Rev     | TTCACCTTCCCAAAGACCAC         |
|              |         |                              |
| PDGFD        | Fwd     | CCAAGGAACCTGCTTCTGAC         |
| PDGFD        | Rev     | CTTGGAGGGATCTCCTTGTG         |
|              |         |                              |
| mIE1         | Fwd     | AGCCACCAACATTGACCACGCAC      |
| mIE1         | Rev     | GCCCCAACCAGGACACACAACCTC     |
|              |         |                              |
| <b>Human</b> |         |                              |
| 18s          | Fwd     | GTAACCCGTTGAACCCCATT         |
| 18s          | Rev     | CCATCCAATCGGTAGTAGCG         |
| PDGFD        | Fwd     | GAACAGCTACCCCAGGAACC         |
| PDGFD        | Rev     | CTTGTGTCCACACCATCGTC         |
